# Supplementary material for: Zinc-based radioenhancers to activate tumor radioimmunotherapy by PD-L1 and cGAS-STING pathway
Source: PubMed Central journal article supplement — J Nanobiotechnology. 2024 Dec 19;22:782. doi: 10.1186/s12951-024-02999-z (PMC11657496; doi:10.1186/s12951-024-02999-z), 2024-12-19
Supplement: 12951_2024_2999_MOESM1_ESM.pdf [file 12951_2024_2999_MOESM1_ESM.pdf]

# Supporting Information

## **Zinc-based radioenhancers to activate tumor radioimmunotherapy by PD-L1 and cGAS-STING pathway**

Mengjiao Xu<sup>#</sup>, Chao Xu<sup>#</sup>, Yu Qiu<sup>#</sup>, Yushuo Feng<sup>#</sup>, Qianqian Shi, Yaqing Liu, Huaping Deng, Xiaoqian Ma, Nuo Lin, Qunying Shi, Zhiyang Shen, Shanshan Meng, Jiang Yang, Hongmin Chen\*, Fangqin Xue\*

M. Xu, Y. Qiu, Y. Feng, Q. Shi, Y. Liu, H. Deng, X. Ma, N. Lin, Q. Shi, Z. Shen, S. Meng, H. Chen\*

State Key Laboratory of Vaccines for Infectious Diseases, Center for Molecular Imaging and Translational Medicine, Xiang An Biomedicine Laboratory, School of Public Health, Xiamen University, China

State Key Laboratory of Molecular Vaccinology and Molecular Diagnostics, National Innovation Platform for Industry-Education Intergration in Vaccine Research, Xiamen University, China

E-mail: hchen@xmu.edu.cn

M. Xu, C. Xu, H. Chen, F. Xue

Department of Gastrointestinal Surgery, Shengli Clinical Medical College of Fujian Medical University, Fujian Provincial Hospital, Fuzhou University Affiliated Provincial Hospital, Fuzhou, China

\*E-mail: xfq9201125105@fjmu.edu.cn

J. Yang

State Key Laboratory of Oncology in South China, Guangdong Key Laboratory of Nasopharyngeal Carcinoma Diagnosis and Therapy, Guangdong Provincial Clinical Research Center for Cancer, Sun Yat-sen University Cancer Center, Guangzhou, 510060 China

## Methods

### Preparation of ZnO-Au@mSiO<sub>2</sub>

ZnO-Au@mSiO<sub>2</sub> nanocomposites were prepared through a template method. Firstly, Au@mSiO<sub>2</sub> NPs were synthesized following a previously reported method<sup>[1]</sup>. Typically, 1.2 mL of 0.5 M NaOH solution was added into 48 mL of cetyl trimethyl ammonium bromide (CTAB, 0.10 g) aqueous solution, and the solution was heated to 80 °C for 15 min with vigorous magnetic stirring. Then, 2.0 mL of formaldehyde solution (3.7 wt%) was added, followed by the addition of 2.0 mL of HAuCl<sub>4</sub> (5 mg/mL) aqueous solution. After 10 min, 2 mL of TEOS (20 wt % ethanol solution) was quickly injected into the above heated solution, and the mixture was further heated for 1 h. After the solution was cooled down to room temperature, the product (SiO<sub>2</sub>@Au) was collected by centrifugation and washed with water for one time and washed with ethanol for two times. To obtain meso-porous SiO<sub>2</sub>, CTAB micelles were removed by an ion-exchange method. SiO<sub>2</sub>@Au was dispersed in 20 mL of ammonium nitrate (0.38 M) solution and stirred at 60 °C for 12 h at reflux to remove the template. The obtained product Au@mSiO<sub>2</sub> NPs were collected by centrifugation and washed with water and ethanol for three times. The obtained Au@mSiO<sub>2</sub> was functionalized with amino and carboxyl groups. In brief, Au@mSiO<sub>2</sub> was redispersed in ethanol (20 mL), and then added 200 µL APTES. After stirring for 12 h at room temperature. Au@mSiO<sub>2</sub>-NH<sub>2</sub> was obtained and washed by centrifugation with water and ethanol for three times. Then, the Au@mSiO<sub>2</sub>-NH<sub>2</sub> was dissolved in DMSO, and added 80 mg succinic anhydride and 1.6 mL triethylamine at room temperature, and then stirred for 12 h to obtain Au@mSiO<sub>2</sub>-COOH.

Then, APTES-modified ZnO QDs (ZnO-NH<sub>2</sub>) were synthesized. Briefly, 30 mL of ethanol was added into a 100 mL round-bottom flask, followed by the addition of Zinc acetate (219.50 mg) and Magnesium acetate (21.45 mg). The mixture was heated to 70 °C and refluxed under vigorous magnetic stirring for 0.5 h. Subsequently, after cooled down to room temperature, 8 mL of NaOH (0.16 M) solution in ethanol was added dropwise and stirred for 4 h to obtain the ZnO QDs. For functionalization of ZnO

QDs, 5 mL of APTES (2% ethanol solution) was added to above ZnO QDs suspension and stirred for another 12 h. The solution was purified with cyclohexane. The obtained ZnO-NH<sub>2</sub> was redispersed in ethanol and it emitted yellow fluorescence when irradiated with a 365 nm UV lamp.

To prepare ZnO-Au@mSiO<sub>2</sub> nanocomposites, aqueous solution of EDC (75 mg/mL, 1 mL) and NHS (30 mg/mL, 1 mL) was added into 20 mL Au@mSiO<sub>2</sub>-COOH (1 mg/mL ethanol solution). After 2 h, ZnO-NH<sub>2</sub> was added, and stirred at room temperature for another 6 h, and centrifuged for several times and the ZnO-Au@mSiO<sub>2</sub> nanocomposites were obtained. In order to improve the water solubility of ZnO-Au@mSiO<sub>2</sub>, polyacrylic acid (PAA) was added in the solution at a ratio of 1:3, stirred at room temperature for 4 h. Afterwards the precipitate was centrifuged, washed several times with H<sub>2</sub>O, and the ZnO-Au@mSiO<sub>2</sub> nanocomposites were obtained and stored at 4 °C for the following experiments.

#### ***In vitro* release of Zn<sup>2+</sup>**

In vitro profiles of the release of Zn<sup>2+</sup> from ZnO-Au@mSiO<sub>2</sub> at different pH (7.4, 6.5 and 5.8) were measured. Briefly, ZnO-Au@mSiO<sub>2</sub> suspension was sealed and shaken different time at 37 °C. At the designated time points, the amount of Zn<sup>2+</sup> released in the medium was centrifuged and detected by Inductively Coupled Plasma-Optical Emission Spectrometer (ICP-OES, PerkinElmer, USA).

#### **Cleavage efficiency of DNAzyme**

To investigate the effect of Zn<sup>2+</sup> on cleavage efficiency, different concentrations of Zn<sup>2+</sup> ions were co-incubated with the mixture of DNAzyme (5 μM) and substrate (5 μM) for 1 h at 37 °C. Then the samples were mixed with loading buffer and added into the freshly prepared 4 % gel. Electrophoresis was performed at a constant potential of 120 V in 1×TBE buffer for 40 minutes. Finally, the images was obtained by using a imaging system (Bio-Rad ChemiDoc XRS System, Bio-Rad, USA).

#### **Cell uptake and cytotoxicity**

The cytotoxicity of ZnO-Au@mSiO<sub>2</sub> was evaluated using a standard MTT assay. Lewis lung tumor cells (LLC) were seeded and incubated for 24 h in 96-well plates.

The cells were treated with ZnO-Au@mSiO<sub>2</sub> and Au@mSiO<sub>2</sub> (0–400 µg/mL) for 12 h, then irradiated with X-ray (8 Gy), and cultured for another 12 h. The MTT assay was then performed, and the absorbance was measured at 490 nm using a microplate reader.

To further identify the uptake effect of ZnO-Au@mSiO<sub>2</sub>, LLC cells ( $1 \times 10^5$  cells per well) were seeded in 24-well plates and cultured for 24 h. Then, the cells were incubated with ZnO-Au@mSiO<sub>2</sub> for different times (0, 2, 4 and 8 h), respectively. All the samples were collected and measured by flow cytometry (FCM, ACEA Biosciences, USA).

### **ROS generation in Cells**

To monitor ROS generation in cells, LLC cells ( $2 \times 10^5$  cells per well) were planted into confocal dishes and 12-well plates for detecting by Laser Scanning Confocal Microscopy (CLSM, Zeiss LSM780, Germany) and FCM (ACEA Biosciences, USA). Then, the cells were irradiated with X-ray (8 Gy) after incubation with ZnO-Au@mSiO<sub>2</sub> (200 µg/mL) for another 12 h. After 2 h incubation, LLC cells were stained with a ROS probe DCFH-DA (10 µM). The generation of ROS was evaluated by the change of fluorescence intensity.

### **Assessment of intracellular apoptosis**

Cell apoptosis was evaluated by FCM using the Annexin V-FITC/PI Apoptosis Detection Kit (BD Biosciences). LLC cells ( $1 \times 10^5$  cells per well) were plated 24-well plates. After 24 h, LLC cells were incubated with ZnO-Au@mSiO<sub>2</sub> (200 µg/mL) and Au@mSiO<sub>2</sub> (200 µg/mL) for another 12 h. Then, the cells were irradiated with X-ray (8 Gy). 12h later, LLC cells were stained with FITC Annexin V and PI for 15 min and measured using FCM (ACEA Biosciences, USA). The apoptotic rate was calculated via the percentage of early apoptotic cells (FITC+/PI-) and late apoptotic cells (FITC+/PI+).

### **Assessment of mitochondrial damage**

To evaluate the change of mitochondrial membrane potential after different treatment, LLC cells were incubated with ZnO-Au@mSiO<sub>2</sub> (200 µg/mL) and Au@mSiO<sub>2</sub> (200 µg/mL) for 12 h. Then, they were irradiated with X-ray (8 Gy). After another 12 h, LLC cells were stained with 20 µM JC-1 for 15 min. After washing with

PBS, the mitochondrial membrane potential was monitored by FCM and CLSM (JC-1 Aggregates, Ex/Em: 585/590 nm; JC-1 Monomer, Ex/Em: 510/527 nm).

To further assess the mitochondria activity, the treated LLC cells were stained with 10  $\mu$ M Mito-Tracker Green, a mitochondria-specific dye, and detected by FCM (ACEA Biosciences, USA).

### **Lipid peroxidation assay**

The cellular oxidative stress response after treated with ZnO-Au@mSiO<sub>2</sub> and X-ray was also evaluated by the detection of lipid peroxidation. LLC cells were incubated with ZnO-Au@mSiO<sub>2</sub> (200  $\mu$ g/mL) and Au@mSiO<sub>2</sub> (200  $\mu$ g/mL) for 12 h, then, were irradiated with X-ray (8 Gy). 12h later, LLC cells were stained with 20  $\mu$ M BODIPY<sup>TM</sup> 581/591 C11 (Lipid Peroxidation Sensor) for 15 min. After washing with PBS, the cells were tested by FCM (ACEA Biosciences, USA).

### **Cell cycle distribution**

Cell cycle and proliferation were investigated using fluorescein Cell Cycle and Apoptosis Analysis Kit (BD Pharmingen). To assess the effect of the ZnO-Au@mSiO<sub>2</sub> on cell cycle distribution, LLC cells ( $1 \times 10^4$  cells per well) were planted into 24-well plates, and treated with ZnO-Au@mSiO<sub>2</sub> (200  $\mu$ g/mL) and PBS for 12 h. Then, the cells were irradiated with X-ray (8 Gy). 12h later, the treated cells were collected and treated with PI, and analyzed using FCM (ACEA Biosciences, USA).

### **Western blotting**

LLC cells and DC 2.4 cells were co-cultured with ZnO-Au@mSiO<sub>2</sub> for 24 h. Then the treated cells were collected for western blotting. LLC cells were used to detect the expression of PD-L1 and ICD related factors, and DC2.4 cells was used to detect the expression of cGAS-STING signal path related factors. Western Blotting were performed according to standard protocols. The primary antibodies used anti-mouse anti-PD-L1 antibody (Abcam, 1:1000), anti-TBK1 Polyclonal antidody (Baijia, 1:1000), anti-TBK1/NAK (phospho-Ser172) antidody (Baijia, 1:1000), anti-IFN- $\beta$  Polyclonal antibody (Baijia, 1:1000), anti-HMGB1-antibody (Baijia, 1:500), anti-Calretinin-antibody (Baijia, 1:1000), anti-GAPDH antibody (CST, 1:1000) and anti- $\beta$ -actin-

antibody (Boster, 1:1000). The blots were developed with BeyoECL Plus substrate (Beyotime, P0018AS), and imaged using a chemiluminescence imaging system (Bio-Rad ChemiDoc XRS System, Bio-Rad, USA).

### **Quantitative PCR (qPCR) analysis**

LLC cells and DC 2.4 were seeded on a 6-well ( $5 \times 10^5$  cells per well) and co-cultured with ZnO-Au@mSiO<sub>2</sub> for 24 h. Then, cells were washed by PBS and collected for real-time quantitative PCR (q-PCR). Total RNA was isolated by Trizol reagent. Reverse transcription was performed to obtain cDNA using SPARKscript II RT Plus Kit with gDNA Eraser. q-PCR analysis was performed using the SYBR Green qPCR Mix. The program was as follows: 94 °C for 3 min, 94 °C for 10 s for 40 cycles, and 60 °C for 30 s. Relative mRNA expression levels of the target genes were normalized to control gene GAPDH. The primer sequences are listed in Supplementary Table 3. LLC cells were used to detect the expression of PD-L1 mRNA and ICD related factors, and DC 2.4 was used to detect the expression of cGAS-STING signal path related factors.

The qPCR data were used to calculate the gene expression based on the cycle threshold (CT) value obtained from the amplification curve. Using the GAPDH gene as an internal reference, the expression of the target gene in the experimental group was calculated as the multiplicity relative to the PBS group, and expressed as  $2^{-\Delta\Delta CT}$  value.

$$\Delta CT = CT (\text{target gene per group}) - CT (\text{internal reference gene per group})$$

$$\Delta\Delta CT = \Delta\Delta CT (\text{experimental group}) - \Delta\Delta CT (\text{PBS group})$$

### **Clone formation**

To evaluate the long-term proliferate ability of treated cells, LLC cells ( $2 \times 10^5$  cells per well) were firstly planted in 6-well plates for 24 h. Then LLC cells were incubated with PBS and ZnO-Au@mSiO<sub>2</sub> in different concentrations (50, 100 and 200 µg/mL) for another 12 h, irradiated with X-ray (8 Gy) and cultured for another 12 h. Then, the cells were collected and re-seeded into 6-well plate (1000 pcs/well) for 10 days. Finally, the LLC cells were fixed and stained with crystal violet and imaged.

### **Biosafety assay**

For hemolysis assay, fresh blood sample collected from a healthy mouse was used to separate red blood cells (RBCs) by diluting with PBS and centrifugation (3000 rpm, 10 min). After washing with PBS for several times, the RBCs (2 %) was treated with saline (negative control), H<sub>2</sub>O (positive control) and various concentrations of ZnO-Au@mSiO<sub>2</sub> (20 mg/kg), and incubated at 37 °C for 3 h. The mixtures were centrifuged (3000 rpm, 10 min). Finally, the absorbance of the supernatant at 540 nm was recorded to calculate the percent hemolysis.

For biochemical analysis, healthy C57BL/6 mice (n = 3) were intravenously injected with ZnO-Au@mSiO<sub>2</sub> (20 mg/kg). The blood samples were collected and centrifuged on 7-, 14- and 21- days post-injection. The obtained serum was used to detect the level of AST, ALT, ALP, ALB, and UREA for biochemical analysis.

#### ***In vivo* evaluation of targetability and distribution**

C57BL/6 mice bearing with LLC tumor (60-100 mm<sup>3</sup>) were injected with CY5.5-labelled ZnO-Au@mSiO<sub>2</sub> (20 mg/kg) and monitored by IVIS imaging systems (Series III, PerkinElmer, USA) to obtain the fluorescence images at various time points (0 h, 3 h, 7 h, 12 h, and 24 h). 24 h later, the mice were sacrificed and the major organs and tumors were collected and analyzed by IVIS imaging systems.

The blood was also collected at different times after administration and detected Zn content by to evaluate the blood circulation profiles and metabolism. The blood was treated with nitric acid and hydrogen peroxide. ICP-MS was applied for quantitative test finally.

#### ***In vivo* anti-tumor therapy**

To further confirm the anti-tumor effects of synergistic enhancement strategy of ZnO-Au@mSiO<sub>2</sub> *in vivo*, we established a subcutaneous LLC tumor model in C57BL/6 mice and randomly divided into four groups (n = 3): PBS (Group 1), PBS + X-ray (Group 2), ZnO-Au@mSiO<sub>2</sub> (Group 3), ZnO-Au@mSiO<sub>2</sub> + X-ray (Group 4). The injection dose was 20 mg/kg. After 12 h intravenous injection, the tumors of group 2 and 4 were treated with X-ray (4 Gy). On Day 7, the same procedure was repeated. The tumor volumes and body weight of mice were measured every two days. Tumor volume

was calculated by  $L \times W^2/2$ , where L and W refer to the length and width of the tumor, respectively. After the treatment period of 14 days, mice were sacrificed and tumors were obtained for hematoxylin-eosin (H&E) staining.

### ***In vivo* antitumor immune responses of ZnO-Au@mSiO<sub>2</sub>**

After 14<sup>th</sup> day different treatment, spleens and lymphonodus were harvested digested, and resuspended to examine immune cells by FCM (Beckman Cytoflex LX, Beckman Coulter, USA). The single cells suspensions were collected according to the manufacturer's protocols (Dakewei, catalogue no. 7211011). Briefly, to analyse cytotoxic T cells, the single cells from spleens were stained with antibodies against CD8a-APC (BioLegend, catalogue no. 100712), CD3-FITC (BioLegend, catalogue no. 100206) and CD4-PE (BioLegend, catalogue no. 100411). To analyse DC maturation, the single cells were stained with antibodies against CD80-APC (BioLegend, catalogue no. 104714), CD86-PE (BioLegend, catalogue no. 159204), CD11c-FITC (BioLegend, catalogue no. 117306).

### **Elisa analysis**

Serum was collected from each group after different treatment and measured the expression level of TNF- $\alpha$  and Granzyme by an Elisa kit according to the manufacturer's instructions.

### **Statistical analysis**

Data were presented as means  $\pm$  standard deviation. For multiple comparisons, one-way ANOVA was performed. Statistical significance was indicated by \* $p < 0.05$ , \*\* $p < 0.01$ , \*\*\* $p < 0.001$ , \*\*\*\* $p < 0.0001$ .

### **Reference**

[1] Zhang, Y.,Guo, C.,Liu, L.,Xu, J.,Jiang, H.,Li, D.,Lan, J.,Li, J.,Yang, J.,Tu, Q.,Sun, X.,Alamgir, M.,Chen, X.,Shen, G.,Zhu, J.,Tao, J., ZnO-based multifunctional nanocomposites to inhibit progression and metastasis of melanoma by eliciting antitumor immunity via immunogenic cell death. *Theranostics* **2020**, *10* (24), 11197-11214.

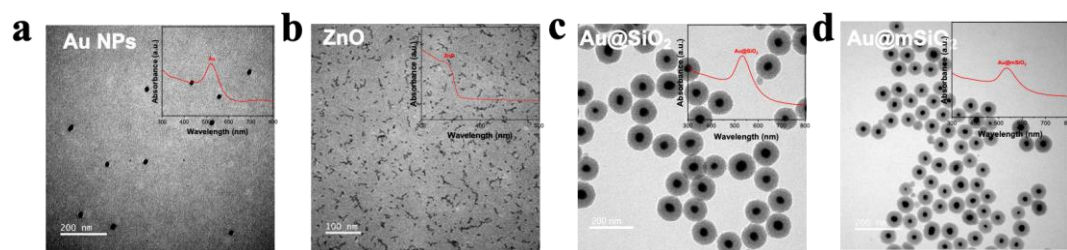

**Figure S1.** TEM images of (a) Au NPs, (b) ZnO, (c) Au@SiO<sub>2</sub> and (d) Au@mSiO<sub>2</sub>.

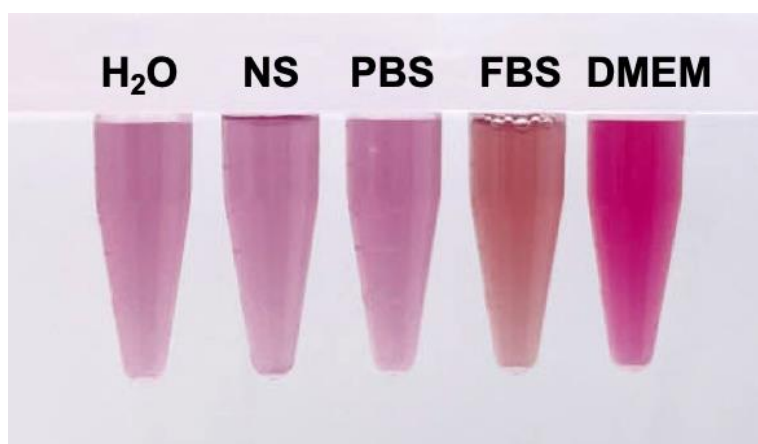

**Figure S2.** Photographs of ZnO-Au@mSiO<sub>2</sub> after being incubated in H<sub>2</sub>O, NS, PBS (7.4), serum (FBS) and cell medium (DMEM) for 12 h.

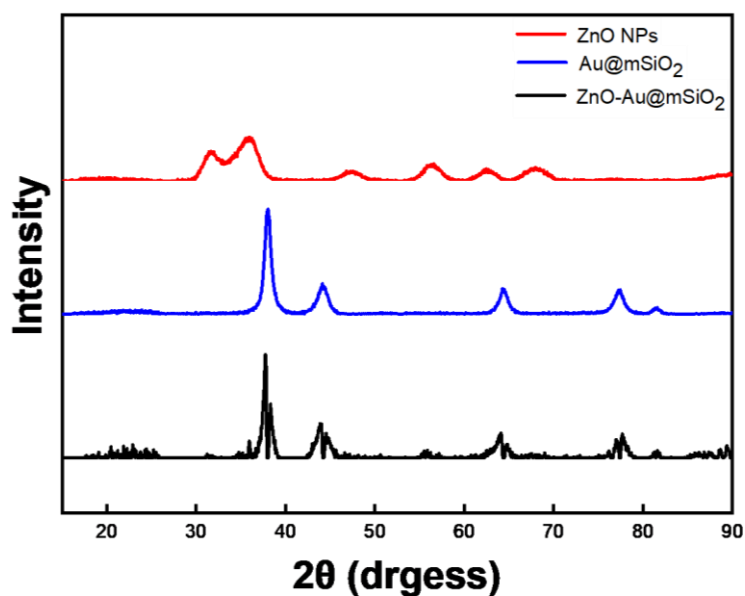

**Figure S3.** Powder XRD patterns of ZnO nanoparticles, Au@mSiO<sub>2</sub>, and ZnO-Au@mSiO<sub>2</sub>.

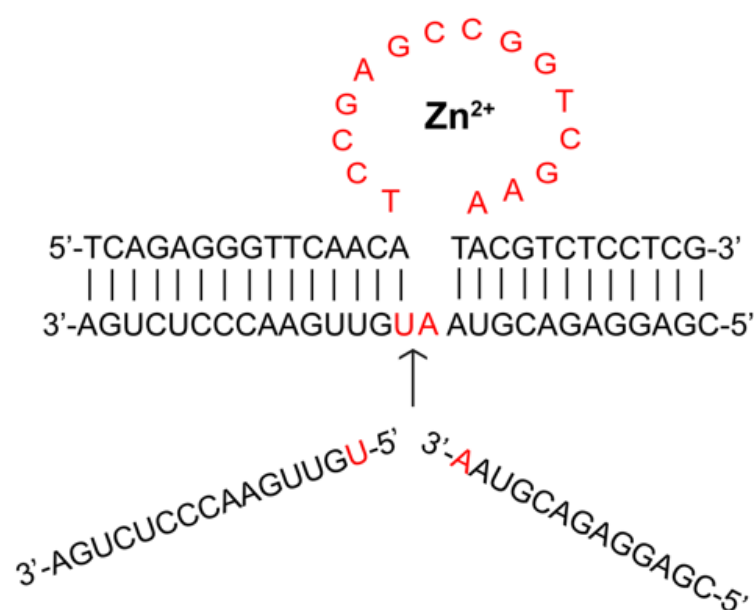

**Figure S4.** Schematic diagram of DNAzyme cutting PD-L1 mRNA. Majuscule marked in red on the mRNA chain is the recognition and cutting site of DNAzyme.

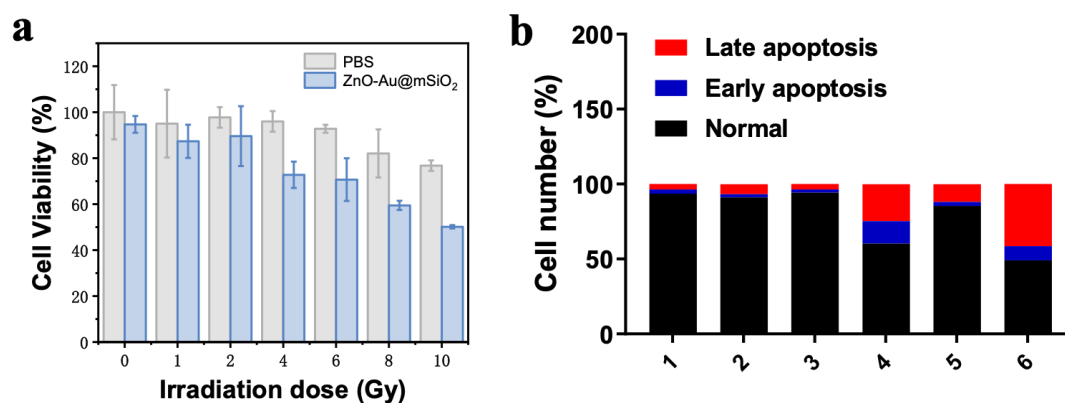

**Figure S5.** (a) The cytocompatibility assessment of ZnO-Au@mSiO<sub>2</sub> on LLC-luc cells under various radiation doses by MTT assay. (b) Early apoptosis and late apoptosis of the LLC cells after treatment with different therapeutic groups.

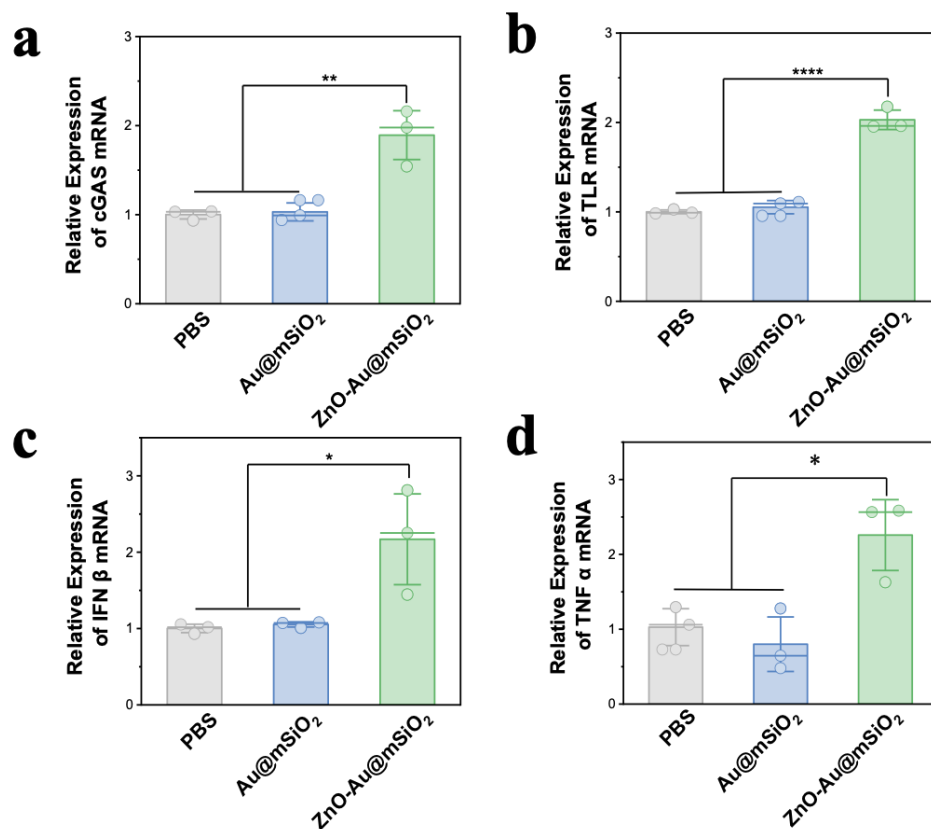

**Figure S6.** qPCR assay measuring the cGAS mRNA, TLR mRNA, IFN β mRNA and TNF mRNA. \* $p < 0.05$ , \*\* $p < 0.01$ , \*\*\* $p < 0.001$ , \*\*\*\* $p < 0.0001$  represent significant difference.

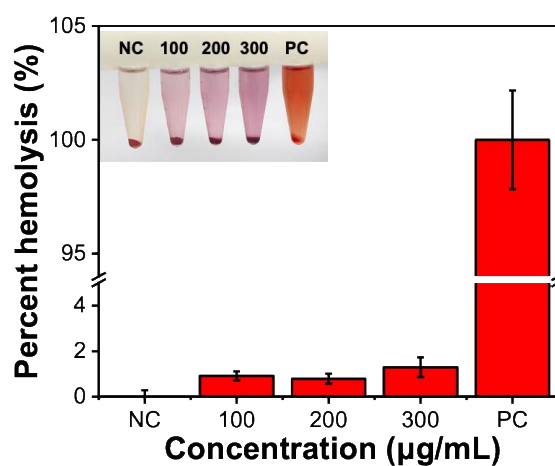

**Figure S7.** Hemolytic photographs and analysis of red blood cells with different treated.

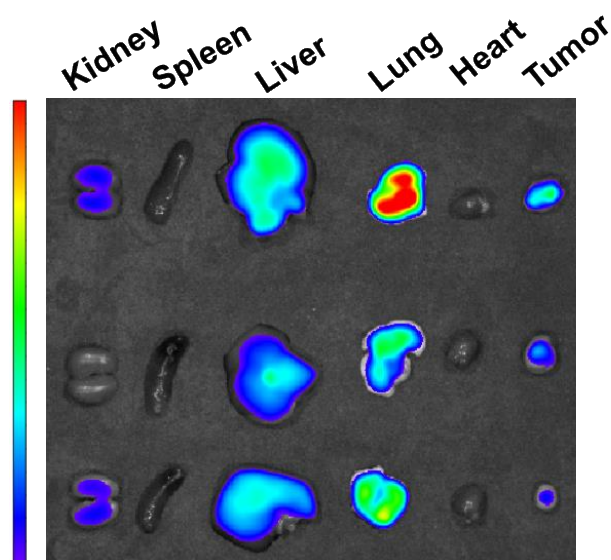

**Figure S8.** Ex vivo fluorescence images of the organs harvested in C57BL/6 tumor-bearing mice at 24 h post-injection of ZnO-Au@mSiO<sub>2</sub>-Cy5.5 (Heart, Liver, Lung, Spleen, Kidney and Tumor).

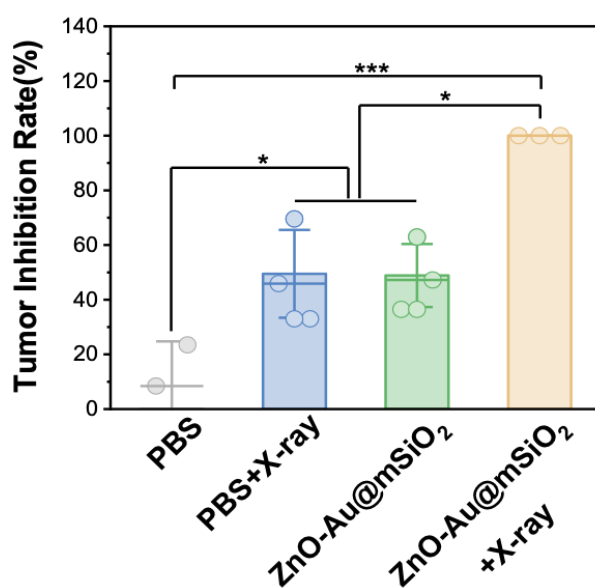

**Figure S9.** Tumor inhibition rate. \* $p < 0.05$ , \*\* $p < 0.01$ , \*\*\* $p < 0.001$  represent significant difference.

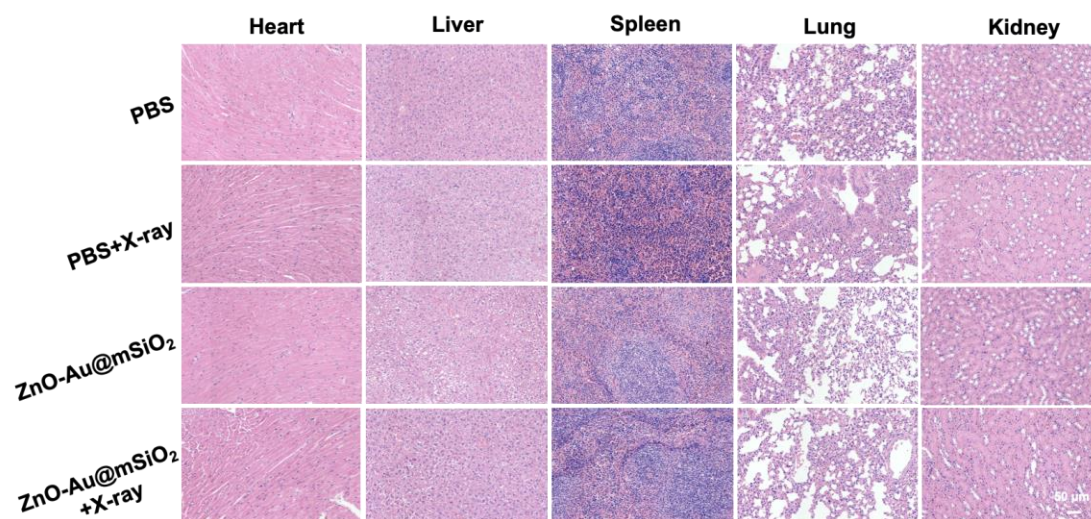

**Figure S10.** H&E staining images of major organs (Heart, Liver, Spleen, Lung and Kidney) collected on Day 15 after different treatments (Scale bar, 50  $\mu\text{m}$ ).

**Table 1.** Blood biochemistry and hematology analysis of mice on day 0, day 7, day 14 and day 21 (n = 3).

| <b>Project abbreviation</b>     | <b>Day 0</b> | <b>Day 7</b> | <b>Day 14</b> | <b>Day 21</b> |
|---------------------------------|--------------|--------------|---------------|---------------|
| <b>WBC (*10<sup>9</sup>/L)</b>  | 5.63±0.72    | 8.1±1.75     | 7.8±1.79      | 11.6±1.76     |
| <b>HGB (g/L)</b>                | 149±13.54    | 126.25±11.15 | 127±6.78      | 136.25±6.08   |
| <b>RBC (*10<sup>12</sup>/L)</b> | 9.04±0.74    | 8.14±0.54    | 7.72±0.18     | 8.58±0.39     |
| <b>HCT (%)</b>                  | 45.63±4.02   | 40.35±2.85   | 41.05±1.67    | 43.03±1.39    |
| <b>MCV (fL)</b>                 | 50.5±0.48    | 49.65±0.58   | 53.23±1.19    | 50.25±0.81    |
| <b>MCH (pg)</b>                 | 16.43±0.25   | 15.48±0.48   | 16.43±0.51    | 15.85±0.54    |
| <b>MCHC (g/L)</b>               | 326±3.16     | 312±6        | 308.75±7.63   | 316±9.93      |
| <b>MPV (fL)</b>                 | 6.05±0.82    | 6.55±1.1     | 6.93±1.01     | 5.83±0.21     |
| <b>PDW</b>                      | 15.58±1.59   | 16.05±1.81   | 16.55±1.45    | 14.33±0.1     |
| <b>ALT (U/L)</b>                | 9.13±2.17    | 12.3±1.99    | 12.33±1.5     | 8.65±1.31     |
| <b>AST (U/L)</b>                | 24.9±6.16    | 22.68±1.56   | 16.73±19.76   | 32.8±9.85     |
| <b>ALP (U/L)</b>                | 87.48±5.47   | 80.38±7.95   | 77.15±12.91   | 92.08±14.58   |
| <b>ALB (g/L)</b>                | 9.08±0.84    | 8.78±0.74    | 9.35±1.45     | 9.65±0.44     |
| <b>UREA (mmol/L)</b>            | 4.49±0.44    | 4.6±0.71     | 3.95±0.92     | 4.45±0.35     |

**Table 2.** The nucleotide sequence required for the experiment (5'-3')

| <b>Name</b>                     | <b>Sequence (5'-3')</b>                         |
|---------------------------------|-------------------------------------------------|
| <b>DNAzyme</b>                  | TCAGAGGGTTCAACA TCCGAGCCGGTCGAA<br>TACGTCTCCTCG |
| <b>PD-L1-mRNA<br/>Substrate</b> | CGAGGAGACGTA/rA/GCAGTGTTGAACCCTCTGA             |

**Table 3.** QPCR primer sequence (5'-3')

| Primer Name                      | Sequence (5'-3')        |
|----------------------------------|-------------------------|
| <b>PD-L1 F</b>                   | CTACGGTGGTGCGGACTACAA   |
| <b>PD-L1 R</b>                   | GGATAACCCTCGGCCTGACATA  |
| <b>CALR F</b>                    | GCAGACCCTGCCATCTATTTC   |
| <b>CALR R</b>                    | TCGGACTTATGTTTGGATTGAC  |
| <b>HMGB1 F</b>                   | GCTGACAAGGCTCGTTATGAA   |
| <b>HMGB1 R</b>                   | CCTTTGATTTTGGGGCGGTA    |
| <b>STING F</b>                   | ATATCTGCGGCTGATCCTGC    |
| <b>STING R</b>                   | GGTCTGCTGGGGCAGTTTAT    |
| <b>IFN <math>\beta</math> F</b>  | ACTGCCTCAAGGACAGGATG    |
| <b>IFN <math>\beta</math> R</b>  | AGCCAGGAGGTTCTCAACAA    |
| <b>TLR F</b>                     | CTGCCACATGACCATCGAG     |
| <b>TLR R</b>                     | GGACAGGGATATGAGGGATTTGG |
| <b>TNF <math>\alpha</math> F</b> | GCTGCACTTTGGAGTGATCG    |
| <b>TNF <math>\alpha</math> R</b> | TCACTCGGGGTTTCGAGAAGA   |

**Table 4.** Flow cytometric antibodies list.

| Antibody name         | Product code | Source    |
|-----------------------|--------------|-----------|
| FITC anti-mouse CD3   | 100203       | Biolegend |
| PE anti-mouse CD8a    | 100707       | Biolegend |
| APC anti-mouse CD4    | 100411       | Biolegend |
| PE anti-mouse CD11c   | 117307       | Biolegend |
| APC anti-mouse CD80   | 104713       | Biolegend |
| FITC anti-mouse CD86  | 100712       | Biolegend |
| PD-L1 antibody        | ab213480     | Abcam     |
| IFN- $\beta$ antibody | IPB3809      | Baijia    |
| TBK1 antibody         | IPB6368      | Baijia    |
| p-TBK1 antibody       | IPH0271      | Baijia    |
| HMGB1 antibody        | BMB1829      | Baijia    |
| CRT antibody          | IMB0350      | Baijia    |
